# Supplementary material
Source: HighWire-hosted journal article supplement (https://lupus.bmj.com/content/5/1/e000276)
Supplement: inline-supplementary-material-1 [file inline-supplementary-material-1.docx]

**APPENDIX**

**Table 1** List of advisors

| **Chairs** | **Affiliations** |
| --- | --- |
| Crow, Mary Kuntz MD  CrowM@HSS.EDU | Chair, Department of Medicine Chief, Rheumatology Division  Hospital for Special Surgery  New York, NY, USA |
| Raj Tummala, MD, MS  Raj.Tummala@astrazeneca.com | Global Clinical Leader  MedImmune  Gaithersburg, MD, USA |
| Lars Rönnblom, MD, PhD  lars.ronnblom@medsci.uu.se | Professor of Rheumatology  Head, Department of Medical Sciences  Uppsala University  Uppsala, Sweden |

| **Advisors: United States** | **Affiliations** |
| --- | --- |
| Roberto Baccala, PhD  rbaccala@scripps.edu | Scripps Research Institute  La Jolla, CA, USA |
| Franck Barrat, PhD  BarratF@hss.edu | HSS Research Institute  New York, NY, USA |
| Michael C. Carroll, PhD  michael.carroll@childrens.harvard.edu | Boston Children’s Hospital  Boston, MA, USA |
| Keith Elkon, MD  elkon@uw.edu | University of Washington  Seattle, WA, USA |
| Richard A. Furie, MD rfurie@northwell.edu | Northwell Health  Great Neck, NY, USA |
| Steve Greenberg, MD, MS sagreenberg@partners.org | Brigham and Women's Hospital  Boston, MA, USA |
| J. Michelle Kahlenberg, MD, PhD mkahlenb@umich.edu | University of Michigan  Ann Arbor, MI, USA |
| Mariana Kaplan, MD kaplanmj@mail.nih.gov | National Institutes of Health  Bethesda, MD, USA |
| R. John Looney, MD John_Looney@urmc.rochester.edu | University of Rochester Medical Center  Rochester, NY, USA |
| Timothy B. Niewold, MD timothy.niewold@nyumc.org | Colton Center for Autoimmunity, New York University School of Medicine  New York, NY, USA |
| Charles Rice, PhD  Charles.Rice@rockefeller.edu | The Rockefeller University  New York, NY, USA |

| **Advisors: Europe** | **Affiliations** |
| --- | --- |
| Yanick Crow, BMedSci, MBBS, MRCP, PhD yanickcrow@mac.com | University of Manchester  Manchester, UK |
| Falk Hiepe, MD, PhD falk.hiepe@charite.de | Charité Universitätsmedizin  Berlin, Germany |
| Ingrid E. Lundberg, MD, PhD  Ingrid.Lundberg@ki.se | Karolinska Institutet  Stockholm, Sweden |
| Xavier Mariette, MD, PhD  xavier.mariette@bct.aphp.fr | Bicetre Hospital, Paris-Sud University  Paris, France |
| Timothy Radstake, MD, PhD T.R.D.J.Radstake@umcutrecht.nl | UMC Utrecht  Utrecht, The Netherlands |
| Edward Vital, MD, ChB, MRCP, PhD  e.m.j.vital@leeds.ac.uk | University of Leeds  Leeds, UK |

| **Advisor: Australia** | **Affiliation** |
| --- | --- |
| Eric Morand, MD  Eric.Morand@monash.edu | Monash University  Melbourne, Australia |
